# Supplementary material for: A Bayesian approach to dynamic homology of morphological characters and the ancestral phenotype of jawed vertebrates
Source: eLife. 2020 Dec 4;9:e62374. doi: 10.7554/eLife.62374 (PMC7793628; doi:10.7554/eLife.62374)
Supplement: Source data 1. [file elife-62374-data1.xlsx]

## Sheet: Sheet1
character	state0	state1	state2	max
1	1	0	0	1
2	0.868962	0.131038	0	0.868962
3	0.996669	0.00333148	0	0.996669
4	1	0	0	1
5	0.907829	0.092171	0	0.907829
6	0.00222099	0.997779	0	0.997779
7	0.998334	0.00166574	0	0.998334
8	0.993892	0.00610772	0	0.993892
9	0.997224	0.00277624	0	0.997224
10	0.0116602	0.98834	0	0.98834
11	0.526374	0.387562	0.0860633	0.526374
12	0.985008	0.0149917	0	0.985008
13	0.573015	0.426985	0	0.573015
14	0.993337	0.00666297	0	0.993337
15	0.897279	0.102721	0	0.897279
16	0.824542	0.175458	0	0.824542
17	0.148251	0.851749	0	0.851749
18	0.0599667	0.940033	0	0.940033
19	1	0	0	1
20	0.999445	0.000555247	0	0.999445
21	1	0	0	1
22	0.366463	0.633537	0	0.633537
23	1	0	0	1
24	0.0416435	0.958356	0	0.958356
25	0.997779	0.00222099	0	0.997779
26	0.939478	0.0605219	0	0.939478
27	0.948362	0.051638	0	0.948362
28	0.985564	0.0144364	0	0.985564
29	0.999445	0.000555247	0	0.999445
30	1	0	0	1
31	1	0	0	1
32	0.999445	0.000555247	0	0.999445
33	0.609106	0.390894	0	0.609106
34	0.996113	0.00388673	0	0.996113
35	0.0105497	0.98945	0	0.98945
36	0.984453	0.0155469	0	0.984453
37	0.998334	0.00166574	0	0.998334
38	0.0360911	0.0871738	0.876735	0.876735
39	0.406996	0.593004	0	0.593004
40	0.243753	0.756247	0	0.756247
41	0.995003	0.00499722	0	0.995003
42	0.22432	0.77568	0	0.77568
43	0.985564	0.0144364	0	0.985564
44	0.905608	0.094392	0	0.905608
45	0.999445	0.000555247	0	0.999445
46	0.34814	0.65186	0	0.65186
47	0.0433093	0.956691	0	0.956691
48	0.935036	0.0649639	0	0.935036
49	0.994448	0.00555247	0	0.994448
50	0.996669	0.00333148	0	0.996669
51	0.999445	0.000555247	0	0.999445
52	0.00277624	0.997224	0	0.997224
53	0.813437	0.186563	0	0.813437
54	0.867851	0.132149	0	0.867851
55	0.885619	0.114381	0	0.885619
56	0.991671	0.00832871	0	0.991671
57	0.880622	0.119378	0	0.880622
58	1	0	0	1
59	1	0	0	1
60	0.99889	0.00111049	0	0.99889
61	0.963354	0.0366463	0	0.963354
62	0.0105497	0.98945	0	0.98945
63	0.84231	0.0971682	0.0605219	0.84231
64	0.0149917	0.985008	0	0.985008
65	0.486396	0.513604	0	0.513604
66	0.952804	0.047196	0	0.952804
67	0.938368	0.0616324	0	0.938368
68	0.995003	0.00499722	0	0.995003
69	0.997779	0.00222099	0	0.997779
70	0.857301	0.142699	0	0.857301
71	0.931705	0.0682954	0	0.931705
72	0.998334	0.00166574	0	0.998334
73	0.998334	0.00166574	0	0.998334
74	1	0	0	1
75	0.0094392	0.990561	0	0.990561
76	0.987785	0.0122154	0	0.987785
77	0.993337	0.00666297	0	0.993337
78	0.378123	0.621877	0	0.621877
79	0.305941	0.694059	0	0.694059
80	0.98834	0.0116602	0	0.98834
81	0.949473	0.0505275	0	0.949473
82	0.91005	0.08995	0	0.91005
83	0.999445	0.000555247	0	0.999445
84	0.973903	0.0260966	0	0.973903
85	0.845086	0.154914	0	0.845086
86	0.926152	0.0738479	0	0.926152
87	0.913381	0.0866185	0	0.913381
88	0.999445	0.000555247	0	0.999445
89	1	0	0	1
90	0.70683	0.29317	0	0.70683
91	0.999445	0.000555247	0	0.999445
92	0.812326	0.187674	0	0.812326
93	0.991671	0.00832871	0	0.991671
94	0.996669	0.00333148	0	0.996669
95	0.976124	0.0238756	0	0.976124
96	0.98834	0.0116602	0	0.98834
97	0.997224	0.00277624	0	0.997224
98	0.958912	0.0410883	0	0.958912
99	0.00222099	0.997779	0	0.997779
100	0.99889	0.00111049	0	0.99889
101	0.999445	0.000555247	0	0.999445
102	0.243198	0.756802	0	0.756802
103	0.97668	0.0094392	0.0138812	0.97668
104	0.964464	0.0355358	0	0.964464
105	0.996113	0.00388673	0	0.996113
106	0.999445	0.000555247	0	0.999445
107	1	0	0	1
108	0.917823	0.0821766	0	0.917823
109	0.0333148	0.966685	0	0.966685
110	0.96613	0.0338701	0	0.96613
111	0.760133	0.239867	0	0.760133
112	0.598556	0.401444	0	0.598556
113	0.880622	0.119378	0	0.880622
114	0.883398	0.116602	0	0.883398
115	0.247085	0.734592	0.0183232	0.734592
116	0.997224	0.00277624	0	0.997224
117	0.71849	0.28151	0	0.71849
118	0.158801	0.705164	0.136036	0.705164
119	0.992227	0.00777346	0	0.992227
120	0.887285	0.112715	0	0.887285
121	0.916713	0.0832871	0	0.916713
122	0.907274	0.0927263	0	0.907274
123	0.993337	0.00666297	0	0.993337
124	0.0744031	0.907274	0.0183232	0.907274
125	0.645197	0.354803	0	0.645197
126	0.873959	0.126041	0	0.873959
127	0.220433	0.143254	0.636313	0.636313
128	0.973348	0.0266519	0	0.973348
129	0.982787	0.0172127	0	0.982787
130	0.998334	0.00166574	0	0.998334
131	0.962243	0.0377568	0	0.962243
132	0.739034	0.260966	0	0.739034
133	0.983898	0.0161022	0	0.983898
134	0.999445	0.000555247	0	0.999445
135	0.433093	0.255969	0.310938	0.433093
136	0.0521932	0.947807	0	0.947807
137	0.879511	0.120489	0	0.879511
138	0.453637	0.546363	0	0.546363
139	0.995003	0.00499722	0	0.995003
140	0.945586	0.0544142	0	0.945586
141	0.905053	0.0949473	0	0.905053
142	0.813437	0.137701	0.0488617	0.813437
143	0.992227	0.00777346	0	0.992227
144	0.131594	0.868406	0	0.868406
145	0.903942	0.0960577	0	0.903942
146	0.222654	0.777346	0	0.777346
147	0.992782	0.00721821	0	0.992782
148	0.991116	0.00888395	0	0.991116
149	0.992227	0.00777346	0	0.992227
150	0.724597	0.275403	0	0.724597
151	0.988895	0.0111049	0	0.988895
152	0.985564	0.0144364	0	0.985564
153	0.902277	0.0977235	0	0.902277
154	0.957246	0.042754	0	0.957246
155	0.998334	0.00166574	0	0.998334
156	0.0544142	0.945586	0	0.945586
157	0.99889	0.00111049	0	0.99889
158	0.971127	0.0161022	0.0127707	0.971127
159	0.650194	0.349806	0	0.650194
160	0.975014	0.0249861	0	0.975014
161	0.282066	0.717934	0	0.717934
162	0.995003	0.00499722	0	0.995003
163	0.0832871	0.916713	0	0.916713
164	0.164908	0.835092	0	0.835092
165	1	0	0	1
166	0.991671	0.00832871	0	0.991671
167	0.997779	0.00222099	0	0.997779
168	0.991116	0.00888395	0	0.991116
169	0.0305386	0.12382	0.845641	0.845641
170	0.0244309	0.975569	0	0.975569
171	0.88673	0.11327	0	0.88673
172	0.991116	0.00888395	0	0.991116
173	0.401444	0.598556	0	0.598556
174	0.960022	0.0399778	0	0.960022
175	0.996669	0.00333148	0	0.996669
176	0.826763	0.173237	0	0.826763
177	0.998334	0.00166574	0	0.998334
178	0.094392	0.905608	0	0.905608
179	0.986119	0.00666297	0.00721821	0.986119
180	0.99889	0.00111049	0	0.99889
181	0.0111049	0.988895	0	0.988895
182	0.893393	0.106607	0	0.893393
183	0.997779	0.00222099	0	0.997779
184	0.856191	0.143809	0	0.856191
185	0.980011	0.0199889	0	0.980011
186	0.987785	0.0122154	0	0.987785
187	0.0177679	0.97779	0.00444198	0.97779
188	0.987785	0.00721821	0.00499722	0.987785
189	0.997224	0.00277624	0	0.997224
190	0.997779	0.00222099	0	0.997779
191	0.0488617	0.917268	0.0338701	0.917268
192	0.994448	0.00555247	0	0.994448
193	0.993892	0.00610772	0	0.993892
194	0.980566	0.0122154	0.00721821	0.980566
195	0.997779	0.00222099	0	0.997779
196	0.997779	0.00222099	0	0.997779
197	0.543587	0.456413	0	0.543587
198	0.706274	0.293726	0	0.706274
199	0.946696	0.0533037	0	0.946696
200	0.999445	0.000555247	0	0.999445
201	1	0	0	1
202	0.982232	0.0177679	0	0.982232
203	0.852304	0.147696	0	0.852304
204	0.993337	0.00666297	0	0.993337
205	0.833426	0.166574	0	0.833426
206	0.939478	0.0605219	0	0.939478
207	0.0838423	0.916158	0	0.916158
208	0.993337	0.00666297	0	0.993337
209	0.971127	0.0288728	0	0.971127
210	0.968906	0.0310938	0	0.968906
211	0.817879	0.182121	0	0.817879
212	0.999445	0.000555247	0	0.999445
213	0.998334	0.00166574	0	0.998334
214	0.997779	0.00222099	0	0.997779
215	0.556913	0.278179	0.164908	0.556913
216	0.810105	0.189895	0	0.810105
217	0.70794	0.29206	0	0.70794
218	1	0	0	1
219	0.419767	0.580233	0	0.580233
220	0.734037	0.265963	0	0.734037
221	0.997779	0.00222099	0	0.997779
222	0.400888	0.172682	0.42643	0.42643
223	0.0216546	0.978345	0	0.978345
224	0.997779	0.00222099	0	0.997779
225	0.306496	0.485286	0.208218	0.485286
226	0.151027	0.848973	0	0.848973
227	0.665741	0.334259	0	0.665741
228	0.986119	0.00721821	0.00666297	0.986119
229	0.962243	0.0377568	0	0.962243
230	0.609106	0.390894	0	0.609106
231	0.992782	0.00721821	0	0.992782
232	0.749584	0.250416	0	0.749584
233	0.0527485	0.947252	0	0.947252
234	0.787896	0.212104	0	0.787896
235	0.934481	0.0655192	0	0.934481
236	0.426985	0.573015	0	0.573015
237	0.98834	0.0116602	0	0.98834
238	0.983898	0.0161022	0	0.983898
239	0.815103	0.184897	0	0.815103
240	0.635203	0.255414	0.109384	0.635203
241	0.997224	0.00277624	0	0.997224
242	0.33759	0.66241	0	0.66241
243	0.486952	0.513048	0	0.513048
244	0.994448	0.00555247	0	0.994448
245	0.65186	0.34814	0	0.65186
246	0.841755	0.158245	0	0.841755
247	0.0832871	0.916713	0	0.916713
248	1	0	0	1
249	0.171571	0.828429	0	0.828429
250	0.87618	0.12382	0	0.87618
251	0.67407	0.32593	0	0.67407
252	0.996669	0.00333148	0	0.996669
253	0.112715	0.887285	0	0.887285
254	0.0727374	0.927263	0	0.927263
255	0.0849528	0.915047	0	0.915047
256	0.992227	0.00777346	0	0.992227
257	0.97779	0.0222099	0	0.97779
258	0.0505275	0.949473	0	0.949473
259	0.0788451	0.921155	0	0.921155
260	0.221544	0.778456	0	0.778456
261	0.987229	0.0127707	0	0.987229
263	0.230983	0.769017	0	0.769017
264	0.986119	0.0138812	0	0.986119
265	0.870072	0.129928	0	0.870072
266	0.990561	0.0094392	0	0.990561
267	0.99889	0.00111049	0	0.99889
268	0.983898	0.0161022	0	0.983898
269	0.0216546	0.978345	0	0.978345
270	0.845641	0.154359	0	0.845641
271	0.921155	0.0788451	0	0.921155
272	0.999445	0.000555247	0	0.999445
273	0.918934	0.0810661	0	0.918934
274	0.496391	0.503609	0	0.503609
275	0.513604	0.287618	0.198778	0.513604
276	0.816213	0.183787	0	0.816213
277	0.996669	0.00333148	0	0.996669
278	0.994448	0.00555247	0	0.994448
279	0.169906	0.830094	0	0.830094
280	0.424209	0.575791	0	0.575791
281	0.534148	0.465852	0	0.534148
282	0.502499	0.21266	0.284842	0.502499
283	0.473626	0.526374	0	0.526374
284	0.878401	0.121599	0	0.878401
285	0.649639	0.350361	0	0.649639
286	0.685175	0.314825	0	0.685175
287	0.970572	0.0294281	0	0.970572
288	0.990006	0.00999445	0	0.990006
289	0.00999445	0.990006	0	0.990006
290	0.784009	0.215991	0	0.784009
291	0.0599667	0.940033	0	0.940033
292	0.0566352	0.943365	0	0.943365
293	0.947252	0.0527485	0	0.947252
294	0.778456	0.221544	0	0.778456
295	0.98834	0.0116602	0	0.98834
296	0.999445	0.000555247	0	0.999445
297	0.553581	0.446419	0	0.553581
298	0.0433093	0.0310938	0.925597	0.925597
299	0.995558	0.00444198	0	0.995558
300	0.0288728	0.971127	0	0.971127
301	0.328151	0.671849	0	0.671849
302	0.372016	0.627984	0	0.627984
303	0.863409	0.136591	0	0.863409
304	0.0172127	0.982787	0	0.982787
305	0.792338	0.207662	0	0.792338
306	0.699611	0.300389	0	0.699611
307	0.945031	0.0549695	0	0.945031
308	0.812882	0.187118	0	0.812882
309	0.110494	0.889506	0	0.889506
310	0.871738	0.128262	0	0.871738
311	0.992782	0.00721821	0	0.992782
312	0.991671	0.00832871	0	0.991671
313	0.895058	0.104942	0	0.895058
314	0.0810661	0.918934	0	0.918934
315	0.993892	0.00610772	0	0.993892
316	0.394781	0.605219	0	0.605219
317	0.975569	0.0244309	0	0.975569
318	0.99889	0.00111049	0	0.99889
319	0.992227	0.00777346	0	0.992227
320	0.926152	0.0738479	0	0.926152
321	0.433093	0.164908	0.401999	0.433093
322	0.732371	0.267629	0	0.732371
323	0.990006	0.00999445	0	0.990006
324	0.997224	0.00277624	0	0.997224
325	0.945586	0.0544142	0	0.945586
326	0.908939	0.0910605	0	0.908939
327	0.96724	0.0327596	0	0.96724
328	0.998334	0.00166574	0	0.998334
329	0.995558	0.00444198	0	0.995558
330	0.993337	0.00666297	0	0.993337
331	0.177124	0.822876	0	0.822876
332	0.93226	0.0677401	0	0.93226
333	0.843976	0.156024	0	0.843976
334	0.997779	0.00222099	0	0.997779
335	0.961688	0.038312	0	0.961688
336	0.0238756	0.976124	0	0.976124
337	0.950028	0.0310938	0.0188784	0.950028
338	0.343143	0.656857	0	0.656857
339	0.972793	0.0272071	0	0.972793
340	0.678512	0.321488	0	0.678512
341	0.856746	0.143254	0	0.856746
342	0.196002	0.803998	0	0.803998
343	0.926152	0.0738479	0	0.926152
344	0.866741	0.133259	0	0.866741
345	0.464187	0.535813	0	0.535813
346	0.999445	0.000555247	0	0.999445
347	0.983343	0.0166574	0	0.983343
348	0.978345	0.0216546	0	0.978345
349	0.114936	0.885064	0	0.885064
350	0.816213	0.0549695	0.128817	0.816213
351	0.996113	0.00388673	0	0.996113
352	0.998334	0.00166574	0	0.998334
353	0.327596	0.672404	0	0.672404
354	0.188784	0.811216	0	0.811216
355	0.935591	0.0644087	0	0.935591
356	1	0	0	1
357	0.980566	0.0194336	0	0.980566
358	0.900056	0.0999445	0	0.900056
359	0.903942	0.0960577	0	0.903942
360	1	0	0	1
361	0.991116	0.00277624	0.00610772	0.991116
362	0.0183232	0.981677	0	0.981677
363	0.903387	0.096613	0	0.903387
364	0.0788451	0.921155	0	0.921155
365	0.964464	0.0355358	0	0.964464
366	0.990561	0.0094392	0	0.990561
367	0.986119	0.0138812	0	0.986119
368	1	0	0	1
369	1	0	0	1
370	1	0	0	1
371	0.888395	0.111605	0	0.888395
372	0.919489	0.0805108	0	0.919489
373	0.906718	0.0932815	0	0.906718
374	0.699056	0.300944	0	0.699056
375	0.931705	0.0682954	0	0.931705
376	0.999445	0.000555247	0	0.999445
377	0.380344	0.619656	0	0.619656
378	0.729039	0.158801	0.11216	0.729039
379	0.0111049	0.988895	0	0.988895
380	0.600222	0.399778	0	0.600222
381	0.179345	0.820655	0	0.820655
382	0.78734	0.21266	0	0.78734
383	0.0272071	0.972793	0	0.972793
384	0.999445	0.000555247	0	0.999445
385	0.856746	0.143254	0	0.856746
386	0.715713	0.284287	0	0.715713
387	0.926152	0.0738479	0	0.926152
388	0.872848	0.127152	0	0.872848
389	0.947807	0.0521932	0	0.947807
390	0.4603	0.5397	0	0.5397
391	0.888395	0.111605	0	0.888395
392	0.949473	0.0505275	0	0.949473
393	1	0	0	1
394	0.99889	0.00111049	0	0.99889
395	0.995003	0.00499722	0	0.995003
396	0.87729	0.12271	0	0.87729
397	0.209328	0.790672	0	0.790672
398	0.999445	0.000555247	0	0.999445
399	0.99889	0.00111049	0	0.99889
400	0.986674	0.0133259	0	0.986674
401	0.769572	0.230428	0	0.769572
402	0.688506	0.311494	0	0.688506
403	0.510827	0.489173	0	0.510827
404	0.998334	0.00166574	0	0.998334
405	0.777346	0.222654	0	0.777346
406	0.294281	0.705719	0	0.705719
407	1	0	0	1
408	0.995558	0.00444198	0	0.995558
409	0.980011	0.0199889	0	0.980011
410	0.638534	0.361466	0	0.638534
411	0.908939	0.0910605	0	0.908939
412	0.907829	0.092171	0	0.907829
413	0.0960577	0.903942	0	0.903942
414	0.389783	0.610217	0	0.610217
415	0.939478	0.0605219	0	0.939478
416	0.586341	0.413659	0	0.586341
417	0.948917	0.0510827	0	0.948917
418	0.878956	0.121044	0	0.878956
419	0.0949473	0.905053	0	0.905053
420	1	0	0	1
421	1	0	0	1
422	0.0199889	0.980011	0	0.980011
423	0.994448	0.00555247	0	0.994448
424	0.00111049	0.99889	0	0.99889
425	0.973348	0.0266519	0	0.973348
426	0.686841	0.313159	0	0.686841
427	0.811216	0.188784	0	0.811216
428	0.053859	0.946141	0	0.946141
429	0.983898	0.0161022	0	0.983898
430	0.851749	0.148251	0	0.851749
431	0.0216546	0.978345	0	0.978345
432	0.860078	0.139922	0	0.860078
433	0.799556	0.181566	0.0188784	0.799556
434	0.994448	0.00555247	0	0.994448
435	0.882288	0.117712	0	0.882288
436	0.99889	0.00111049	0	0.99889
437	0.958356	0.0416435	0	0.958356
438	0.688506	0.159911	0.151582	0.688506
439	0.992227	0.00777346	0	0.992227
440	0.971127	0.0288728	0	0.971127
441	1	0	0	1
442	0.99889	0.00111049	0	0.99889
443	0.0788451	0.921155	0	0.921155
444	0.617435	0.382565	0	0.617435
445	0.0188784	0.981122	0	0.981122
446	0.978901	0.0210994	0	0.978901
447	1	0	0	1
448	0.867296	0.0949473	0.0377568	0.867296
449	0.992227	0.00777346	0	0.992227
450	0.295947	0.704053	0	0.704053
451	0.993892	0.00610772	0	0.993892
452	1	0	0	1
453	0.239311	0.760689	0	0.760689
454	0.999445	0.000555247	0	0.999445
455	0.894503	0.105497	0	0.894503
456	0.994448	0.00555247	0	0.994448
457	0.995558	0.00444198	0	0.995558
458	0.986674	0.0133259	0	0.986674
459	0.997779	0.00222099	0	0.997779
460	0.999445	0.000555247	0	0.999445
461	0.993337	0.00666297	0	0.993337
462	0.970572	0.0294281	0	0.970572
463	0.222654	0.777346	0	0.777346
464	0.0916158	0.908384	0	0.908384
465	0.721821	0.278179	0	0.721821
466	0.416991	0.583009	0	0.583009
467	0.949473	0.0505275	0	0.949473
468	0.921155	0.0788451	0	0.921155
469	0.455303	0.544697	0	0.544697
470	0.997779	0.00222099	0	0.997779
471	0.378123	0.621877	0	0.621877
472	0.0183232	0.981677	0	0.981677
473	0.127152	0.872848	0	0.872848
474	0.111049	0.888951	0	0.888951
475	0.385897	0.614103	0	0.614103
476	0.0133259	0.986674	0	0.986674
477	0.979456	0.0205441	0	0.979456
479	0.975569	0.0244309	0	0.975569
480	0.995003	0.00499722	0	0.995003
481	0.950583	0.049417	0	0.950583
482	0.990006	0.00999445	0	0.990006
483	0.800111	0.199889	0	0.800111
484	0.858412	0.141588	0	0.858412
485	0.987785	0.0122154	0	0.987785
486	0.996669	0.00333148	0	0.996669
487	0.997224	0.00277624	0	0.997224
488	0.3809	0.452526	0.166574	0.452526
489	0.514714	0.327596	0.15769	0.514714
490	0.00499722	0.995003	0	0.995003
491	0.0360911	0.963909	0	0.963909
492	0.0388673	0.961133	0	0.961133
493	0.0688506	0.931149	0	0.931149
494	0.996669	0.00333148	0	0.996669
495	0.998334	0.00166574	0	0.998334
496	0.981677	0.0183232	0	0.981677
497	0.993892	0.00610772	0	0.993892
498	0.998334	0.00166574	0	0.998334
499	0.932815	0.0671849	0	0.932815
500	0.946141	0.053859	0	0.946141
501	0.867851	0.132149	0	0.867851
502	0.130483	0.869517	0	0.869517
503	0.872293	0.127707	0	0.872293
504	0.861188	0.138812	0	0.861188
505	0.875069	0.124931	0	0.875069
506	0.629095	0.370905	0	0.629095
507	0.154914	0.845086	0	0.845086
