# Supplementary figures and images for: A Bayesian approach to dynamic homology of morphological characters and the ancestral phenotype of jawed vertebrates
Source: eLife journal article supplement (doi:10.7554/elife.62374), 2020-12-04

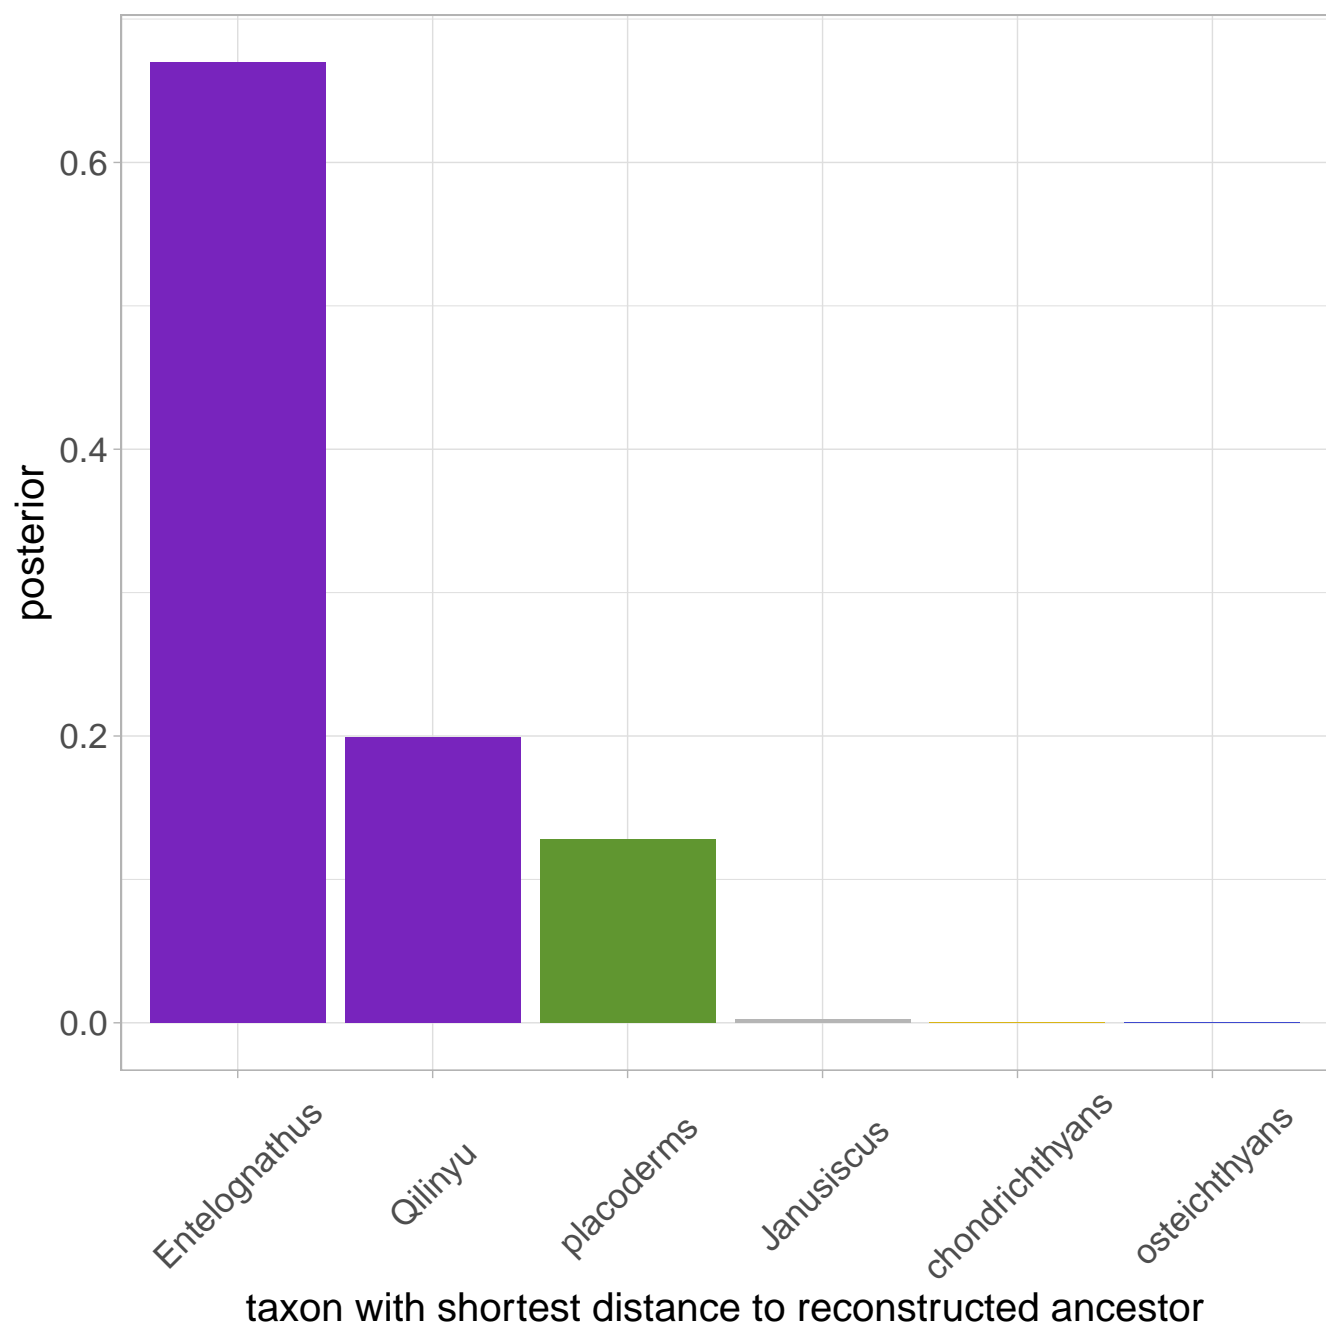

Supplement: supp [file elife_poa_e62374_Appendix_1_figure_1.pdf › elife_poa_e62374_Appendix_1_figure_1.pdf]
